# Supplementary material for: A fluorescent and colorimetric probe based on naphthalene diimide and its high sensitivity towards copper ions when used as test strips
Source: Royal Society of Chemistry journal article supplement (doi:10.1039/c9ra01122f), 2019-01-01
Supplement: c9ra01122f1.pdf [file c9ra01122f1.pdf]

## Electronic Supplementary Material

*for*

### A Fluorescent and Colorimetric Probe based on Naphthalene Diimide and High Sensitivity towards Copper Ions as Test Strips

Luyi Zong, Can Wang, Yuchen Song, Jie Hu, Qianqian Li,\* and Zhen Li\*

Department of Chemistry, Hubei Key Lab on Organic and Polymeric Opto-Electronic Materials, Wuhan University, Wuhan 430072, China

Corresponding authors. Phone: 86-27-68755363; Fax: 86-27-68755363;

E-mail: qianqian-alinda@163.com, lizhen@whu.edu.cn

**Table S1.** Performance compared with available Cu<sup>2+</sup>probes.

| Ligand name                                                                               | Fluorescence modes                                                                 | Detection limit    | Fluorophore                | Issues                                                  |
|-------------------------------------------------------------------------------------------|------------------------------------------------------------------------------------|--------------------|----------------------------|---------------------------------------------------------|
| 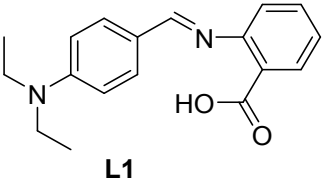<br>L1 | Quenching<br>$\lambda_{\text{ex}}/\lambda_{\text{em}}=341\text{nm}/393\text{nm}$   | 2.48 $\mu\text{M}$ |                            | Also complex with Fe <sup>2+</sup> , Fe <sup>3+</sup>   |
| <br>L2 | Enhancement<br>$\lambda_{\text{ex}}/\lambda_{\text{em}}=440\text{nm}/510\text{nm}$ | 28 ppb             | Salicylaldehyde derivative | Also complexes with Co <sup>2+</sup> , Hg <sup>2+</sup> |

|                                                                                                      |                                                                                                  |                                           |                                   |                                                                                            |
|------------------------------------------------------------------------------------------------------|--------------------------------------------------------------------------------------------------|-------------------------------------------|-----------------------------------|--------------------------------------------------------------------------------------------|
| 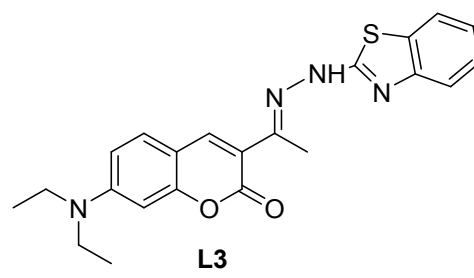 <p><b>L3</b></p>   | <p>Enhancement</p> <p><math>\lambda_{\text{ex}}/\lambda_{\text{em}}=367</math><br/>nm/457 nm</p> | <p>0.058 <math>\mu\text{M}</math></p>     | <p>Coumarin<br/>derivative</p>    | <p>Also<br/>complexes<br/>with <math>\text{Hg}^{2+}</math><br/>(response<br/>time= 1h)</p> |
|  <p><b>L4</b></p>   | <p>Quenching</p> <p><math>\lambda_{\text{ex}}/\lambda_{\text{em}}=420</math><br/>nm/468 nm</p>   | <p>1.96 <math>\mu\text{M}</math></p>      | <p>Coumarin<br/>derivative</p>    |                                                                                            |
|  <p><b>L5</b></p>  | <p>Enhancement</p> <p><math>\lambda_{\text{ex}}/\lambda_{\text{em}}=552</math><br/>nm/580 nm</p> | <p>126 ppb</p>                            | <p>Rhodamine<br/>derivative</p>   | <p>Also<br/>complexes<br/>with <math>\text{Zn}^{2+}</math></p>                             |
|  <p><b>L6</b></p> | <p>Enhancement</p> <p><math>\lambda_{\text{em}}=676</math> nm</p>                                | <p>0.023<br/><math>\mu\text{M}</math></p> | <p>DCM<br/>derivative</p>         | <p>Response<br/>time = 40<br/>min</p>                                                      |
|  <p><b>L7</b></p> | <p>Enhancement</p> <p><math>\lambda_{\text{ex}}/\lambda_{\text{em}}=460</math><br/>nm/514 nm</p> | <p>55 nM</p>                              | <p>Fluorescein<br/>derivative</p> | <p>Response<br/>time = 1<br/>min</p>                                                       |
|  <p><b>L8</b></p> | <p>Quenching</p> <p><math>\lambda_{\text{ex}}/\lambda_{\text{em}}=470</math> nm/<br/>530 nm</p>  | <p>0.84 <math>\mu\text{M}</math></p>      |                                   |                                                                                            |

|          |                                     |              |                |           |
|----------|-------------------------------------|--------------|----------------|-----------|
| Our Work | Quenching                           | 0.97 $\mu$ M | NDI derivative | Response  |
|          | $\lambda_{ex}/\lambda_{em}=602$ nm/ |              |                | time = 30 |
|          | 638 nm                              |              |                | s         |

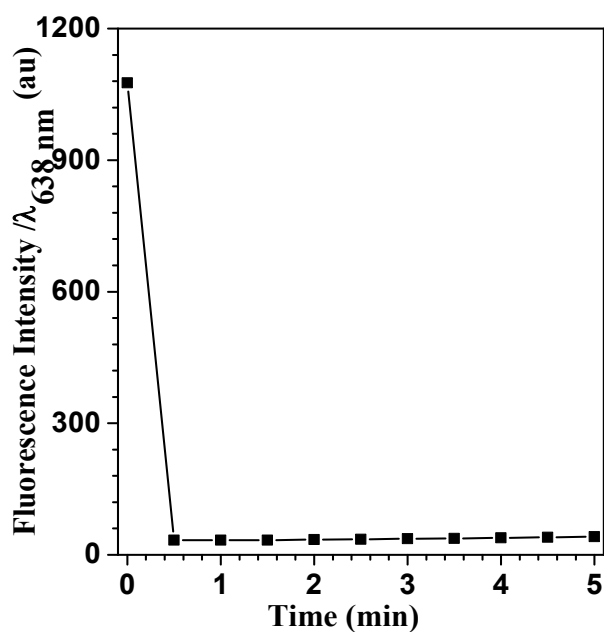

**Fig.S1** Time-dependent quenching upon addition of a Cu ion source. The excited wavelength was 605 nm.

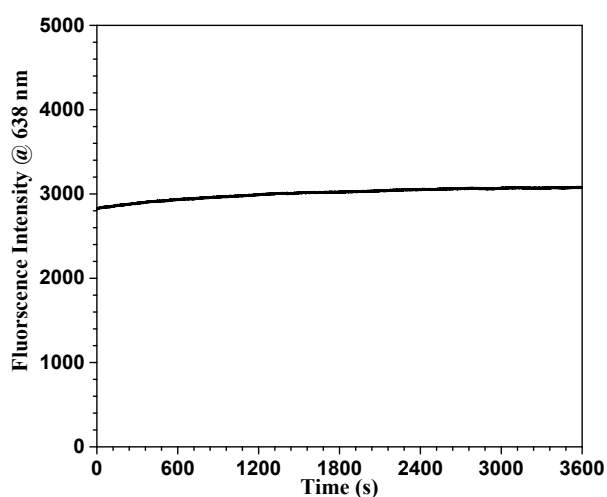

**Fig. S2** The fluorescence intensity of NDI-Py in solution (concentration:  $1 \times 10^{-5}$  mol/L) with increasing scan (0–3600 s). Excitation wavelength: 605 nm.

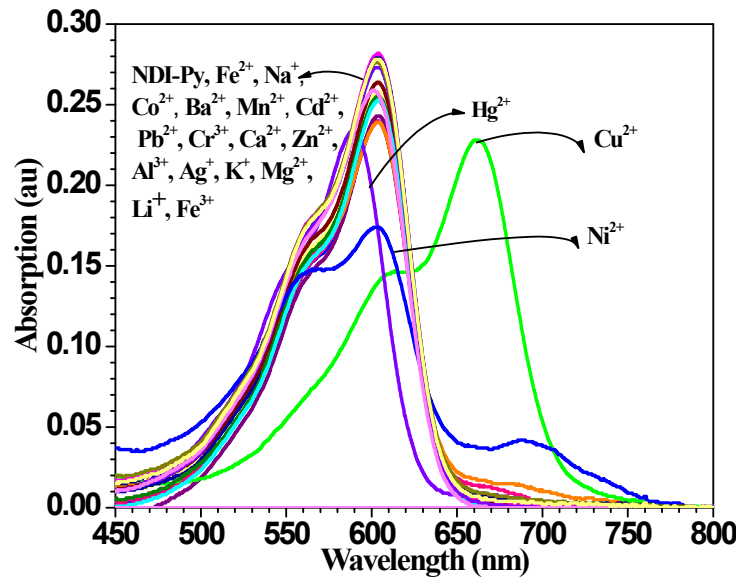

**Fig. S3** The UV-visible spectra of NDI-Py in acetone (20  $\mu\text{M}$ ) towards 1.0 equiv. of various metal ions

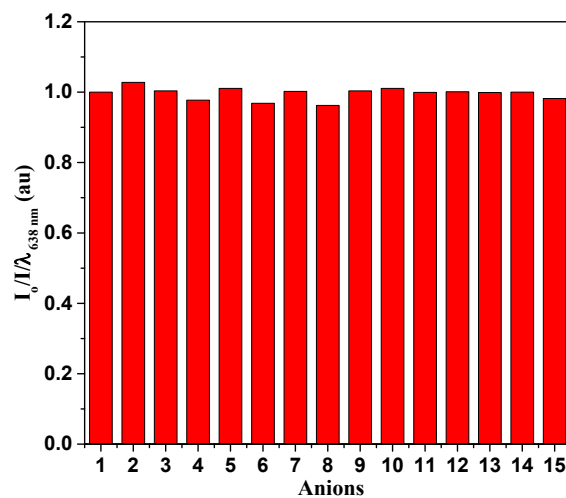

**Fig. S4** The changes of fluorescence intensity of NDI-Py (10  $\mu\text{M}$  in acetone) at 638 nm with 10 equiv of different anions. (1) Blank; (2)  $\text{F}^-$ ; (3)  $\text{Cl}^-$ ; (4)  $\text{I}^-$ ; (5)  $\text{Br}^-$ ; (6)  $\text{ClO}_3^-$ ; (7)  $\text{CO}_3^{2-}$ ; (8)  $\text{HCO}_3^-$ ; (9)  $\text{HSO}_3^-$ ; (10)  $\text{S}_2\text{O}_3^{2-}$ ; (11)  $\text{S}_2\text{O}_5^{2-}$ ; (12)  $\text{SO}_3^{2-}$ ; (13)  $\text{SO}_4^{2-}$ ; (14)  $\text{NO}_2^-$ ; (15)  $\text{NO}_3^-$ .

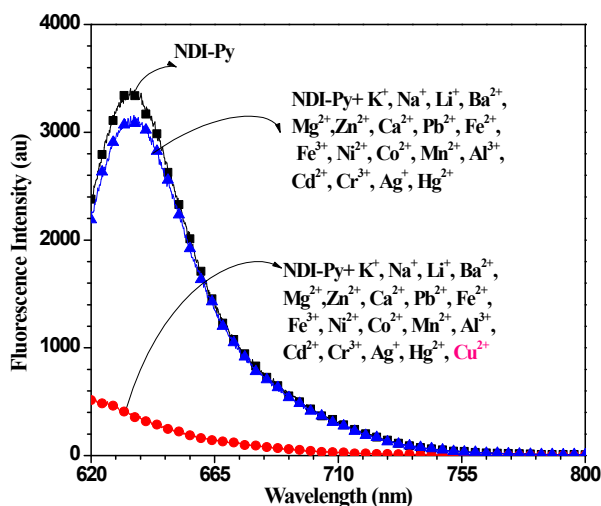

**Fig. S5** Fluorescence spectra of **NDI-Py** (10  $\mu\text{M}$  in acetone) with the addition of different metal ions (1 equiv.) at the same time.

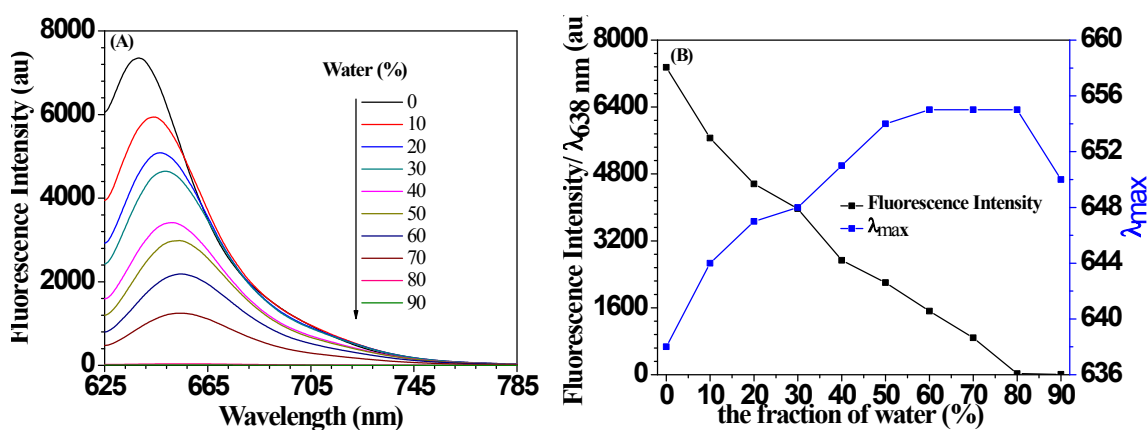

**Fig. S6** (A) The changes of fluorescence intensity of **NDI-Py** in acetone with different HEPES buffer (10  $\mu\text{M}$ , pH=7.0) contents; (B) Relationship between the HEPES buffer (10  $\mu\text{M}$ , pH=7.0) contents and the corresponding fluorescence intensity and maximum emission wavelength of **NDI-Py** in acetone/HEPES mixed solvent

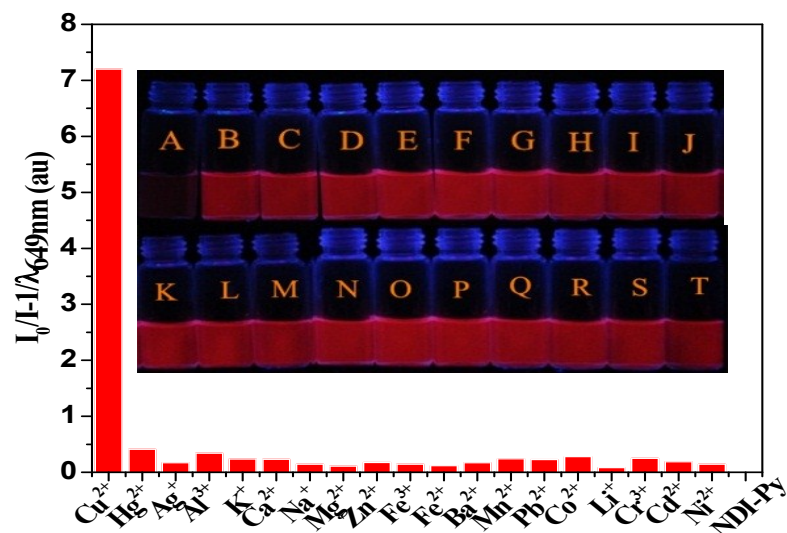

**Fig. S7** Fluorescence spectra profiles of **NDI-Py** in acetone and HEPES solution (v/v: 7/3) (10  $\mu$ M) towards 1.0 equiv of various metal ions. Inset: fluorescence photographs of compound **NDI-Py** with various metal ions : A)  $\text{Cu}^{2+}$ , B)  $\text{Hg}^{2+}$ , C)  $\text{Ag}^+$ , D)  $\text{Al}^{3+}$ , E)  $\text{Na}^+$ , F)  $\text{K}^+$ , G)  $\text{Ca}^{2+}$ , H)  $\text{Mg}^{2+}$ , I)  $\text{Zn}^{2+}$ , J)  $\text{Fe}^{3+}$ , K)  $\text{Fe}^{2+}$ , L)  $\text{Ba}^{2+}$ , M)  $\text{Mn}^{2+}$ , N)  $\text{Pb}^{2+}$ , O)  $\text{Co}^{2+}$ , P)  $\text{Li}^+$ , Q)  $\text{Cr}^{3+}$ , R)  $\text{Cd}^{2+}$ , S)  $\text{Ni}^{2+}$ , T) **NDI-Py**

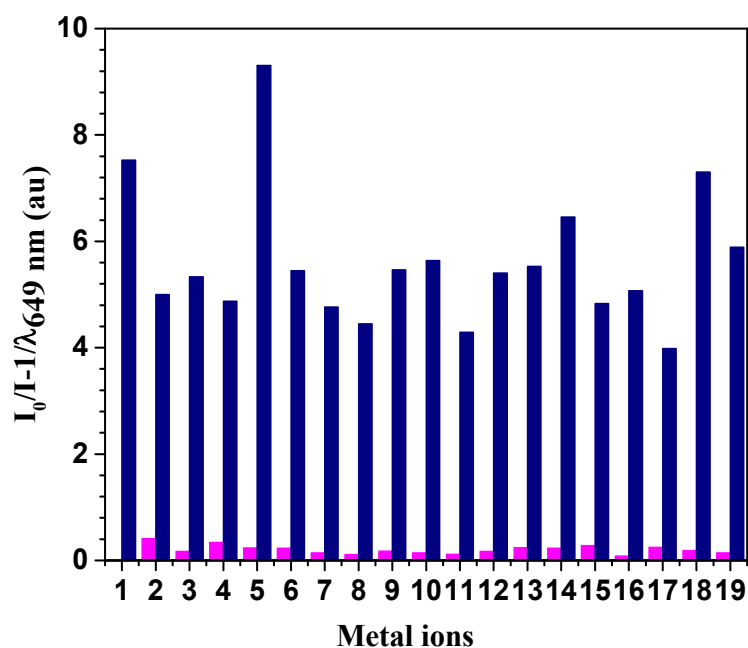

**Fig. S8** Fluorescence spectra profiles of **NDI-Py** in acetone and HEPES solution (V/V: 7/3) (10  $\mu$ M) towards 1 equiv. of copper ions in the presence of the same amount of

other metal ions. 1) **NDI-Py**, 2)  $\text{Hg}^{2+}$ , 3)  $\text{Ag}^+$ , 4)  $\text{Al}^{3+}$ , 5)  $\text{Na}^+$ , 6)  $\text{K}^+$ , 7)  $\text{Ca}^{2+}$ , 8)  $\text{Mg}^{2+}$ , 9)  $\text{Zn}^{2+}$ , 10)  $\text{Fe}^{3+}$ , 11)  $\text{Fe}^{2+}$ , 12)  $\text{Ba}^{2+}$ , 13)  $\text{Mn}^{2+}$ , 14)  $\text{Pb}^{2+}$ , 15)  $\text{Co}^{2+}$ , 16)  $\text{Li}^+$ , 17)  $\text{Cr}^{3+}$ , 18)  $\text{Cd}^{2+}$ , 19)  $\text{Ni}^{2+}$ . The magenta bars represent the relative fluorescence intensities of **NDI-Py** with various metal ions. The navy bars represent the relative fluorescence intensities of **NDI-Py** towards copper ions in the presence of other competing metal ions

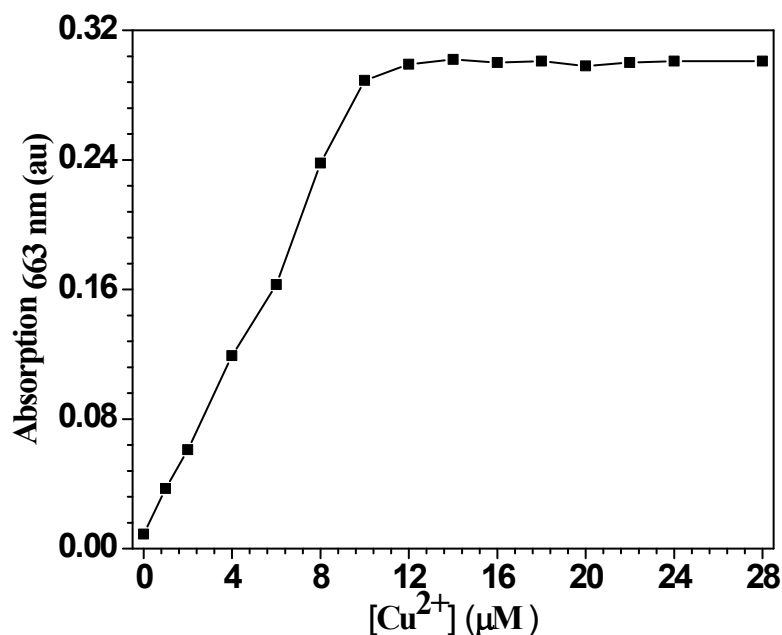

**Fig. S9** The changes of absorption of **NDI-Py** at 663 nm in acetone (20 μM)

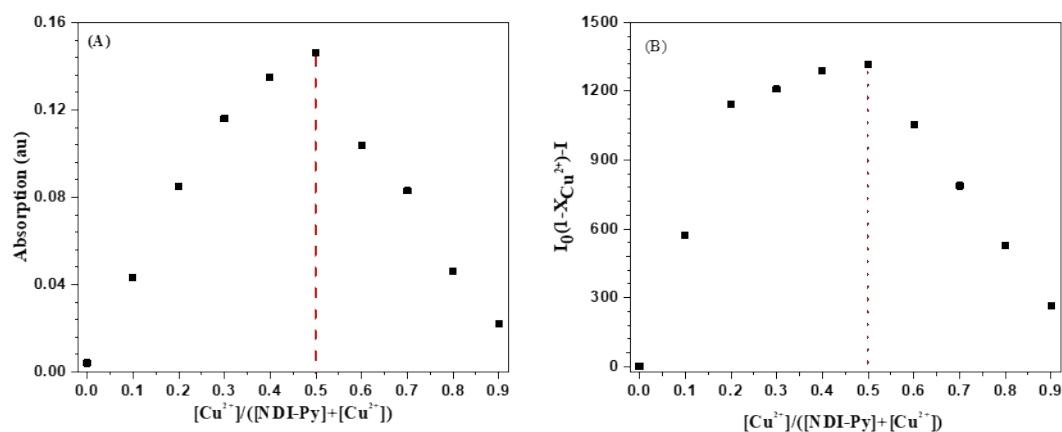

**Fig. S10** (A) Job's plot of **NDI-Py** and copper ions ( $[\text{NDI-Py}] + [\text{Cu}^{2+}] = 40 \mu\text{M}$ ) in acetone by UV-vis spectra, where the absorption at 663 nm was plotted against the mole fraction of  $[\text{Cu}^{2+}]/([\text{NDI-Py}]+[\text{Cu}^{2+}]$ ). (B) Job's plot of **NDI-Py** and copper ions ( $[\text{NDI-Py}] + [\text{Cu}^{2+}] = 40 \mu\text{M}$ ) in acetone by fluorescence spectra, where the fluorescence intensity at 638 nm was plotted against the mole fraction of  $[\text{Cu}^{2+}]/([\text{NDI-Py}]+[\text{Cu}^{2+}]$ ).

ESI-2015-N094-1 #159 RT: 4.00 AV: 1 NL: 4.56E4  
T: + c ESI Full ms [500.00-1000.00]

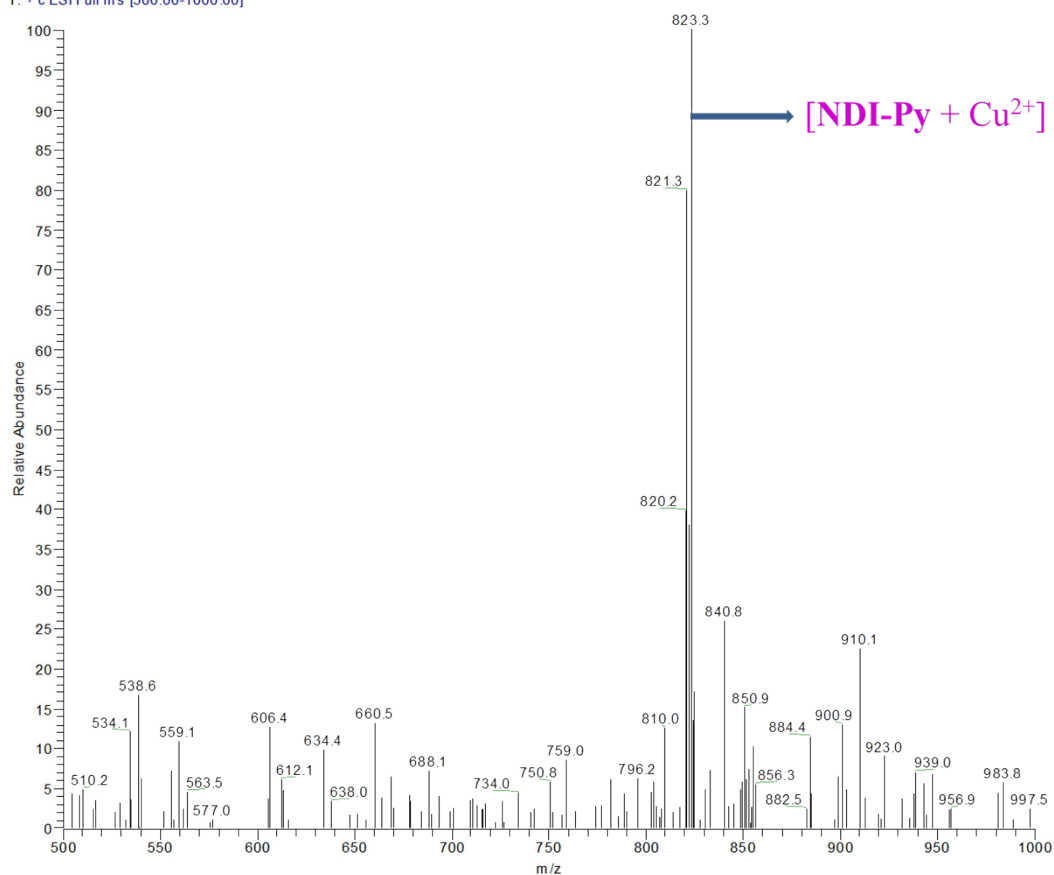

Fig. S11 ESI-MS spectrum of NDI-Py with copper ions.

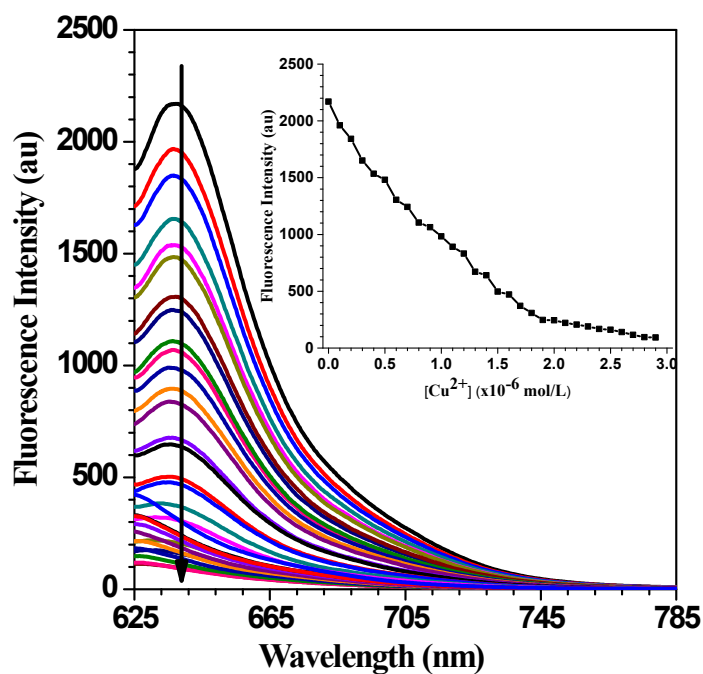

Fig. S12 Fluorescence titration curve of NDI-Py (2.0  $\mu\text{M}$ ) in acetone with different concentrations of copper ions



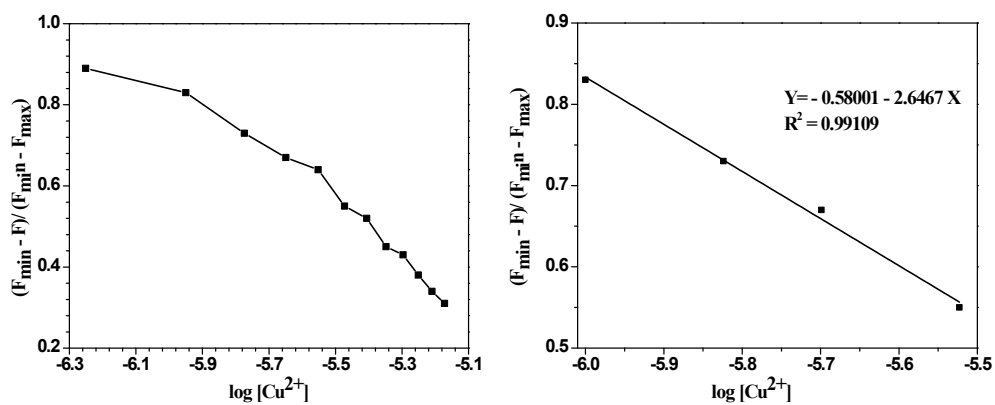

**Fig. S13** The changes of fluorescence signal with different concentrations of copper ions

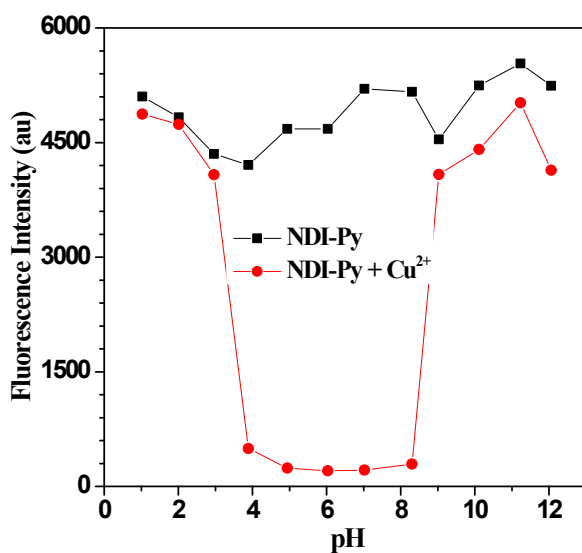

**Fig. S14** The changes of fluorescence intensity of NDI-Py in the presence and absence of  $Cu^{2+}$  with variation of pH values.

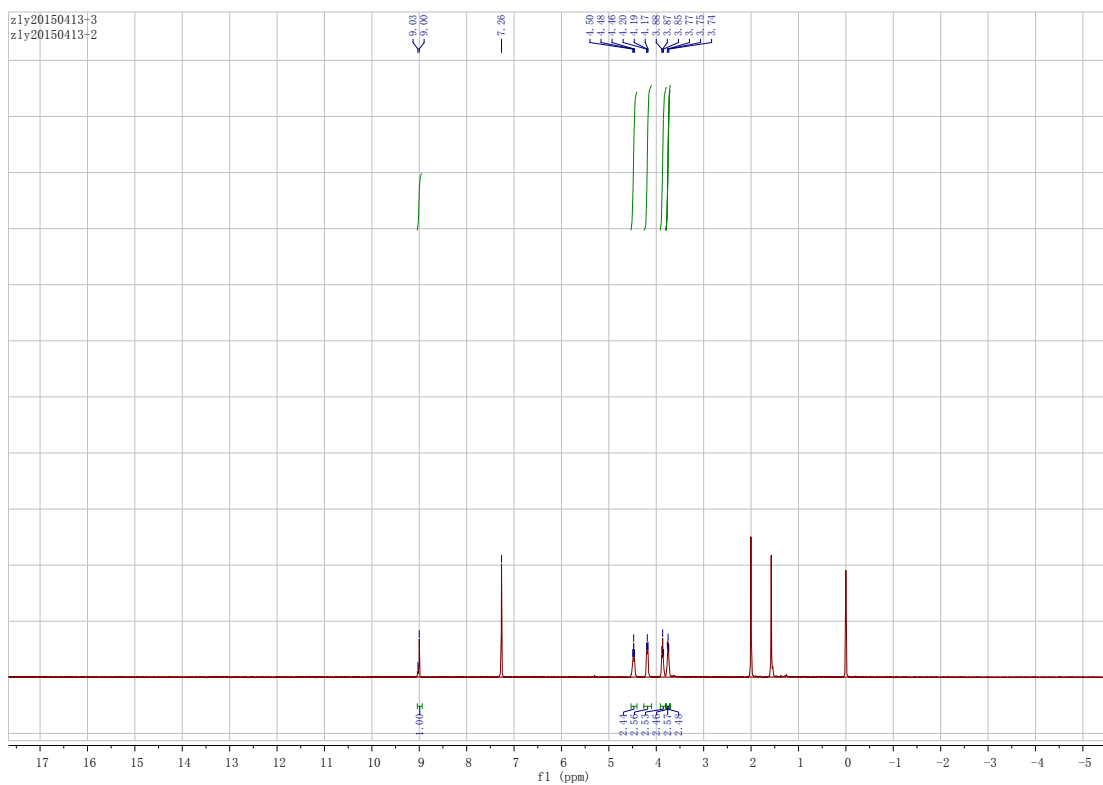

**Fig. S15** The  $^1\text{H}$  NMR spectrum of compound **2**

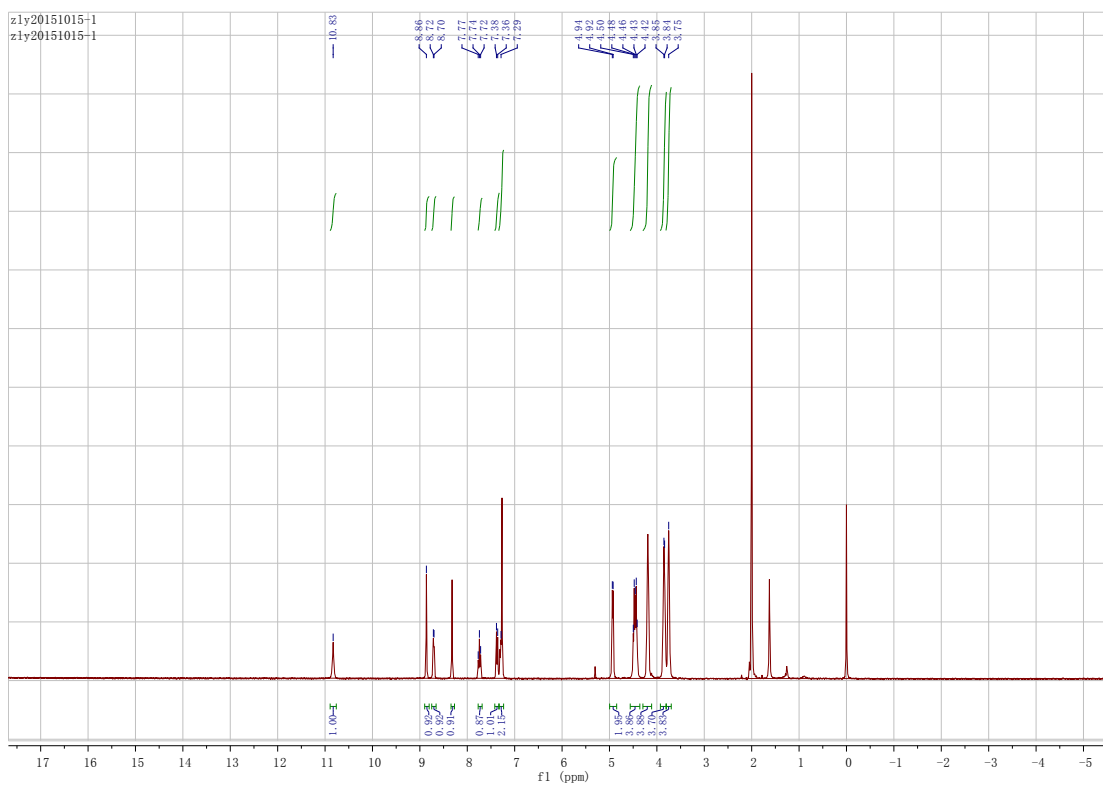

**Fig.S16** The  $^1\text{H}$  NMR spectrum of compound **3**

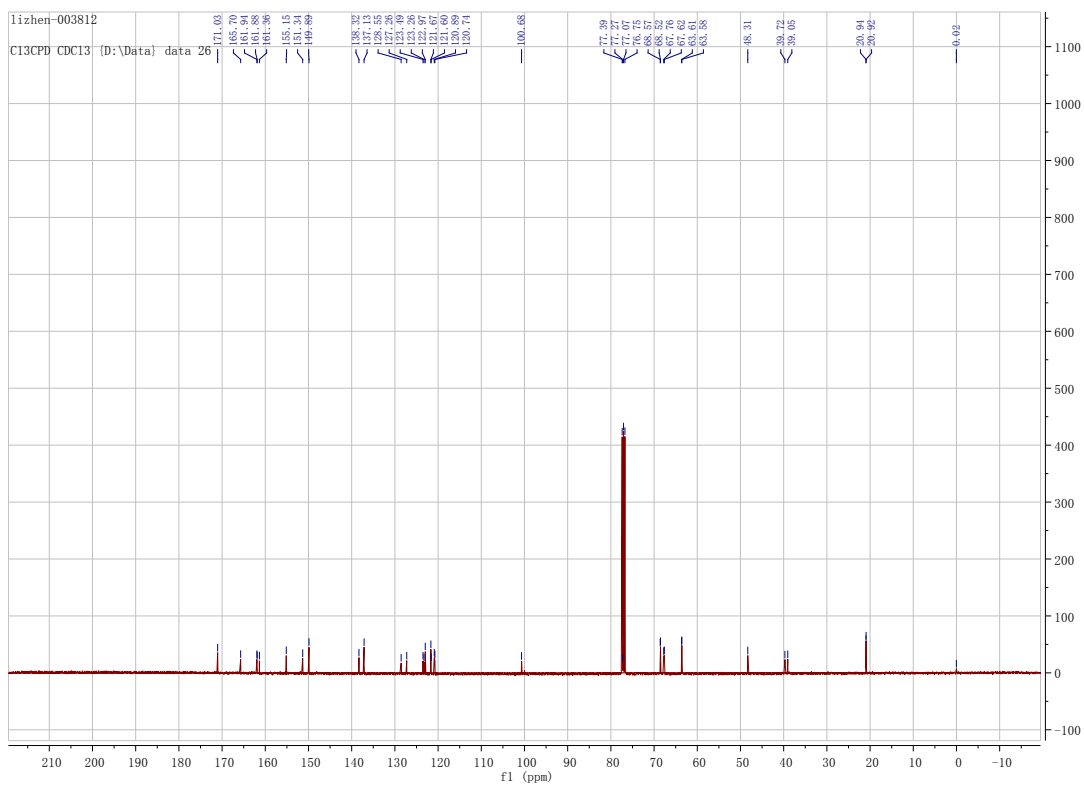

**Fig.S17** The  $^{13}\text{C}$  NMR spectrum of compound **3**.

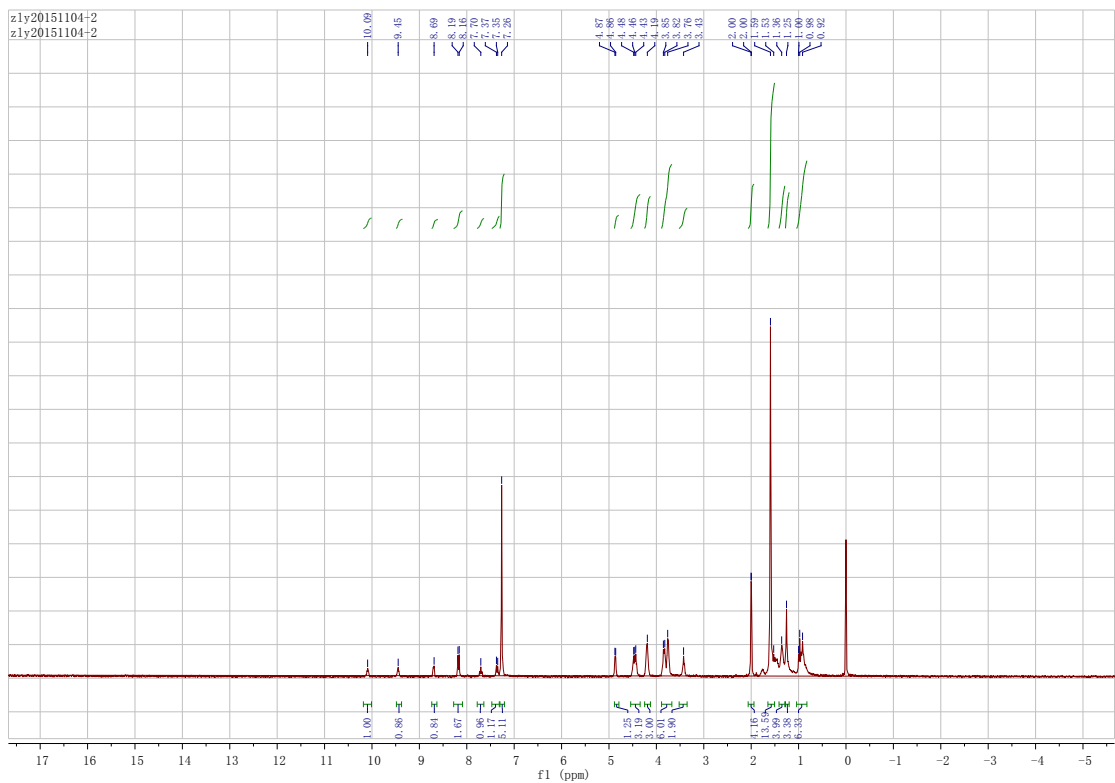

**Fig. S18** The  $^1\text{H}$  NMR spectrum of NDI-Py

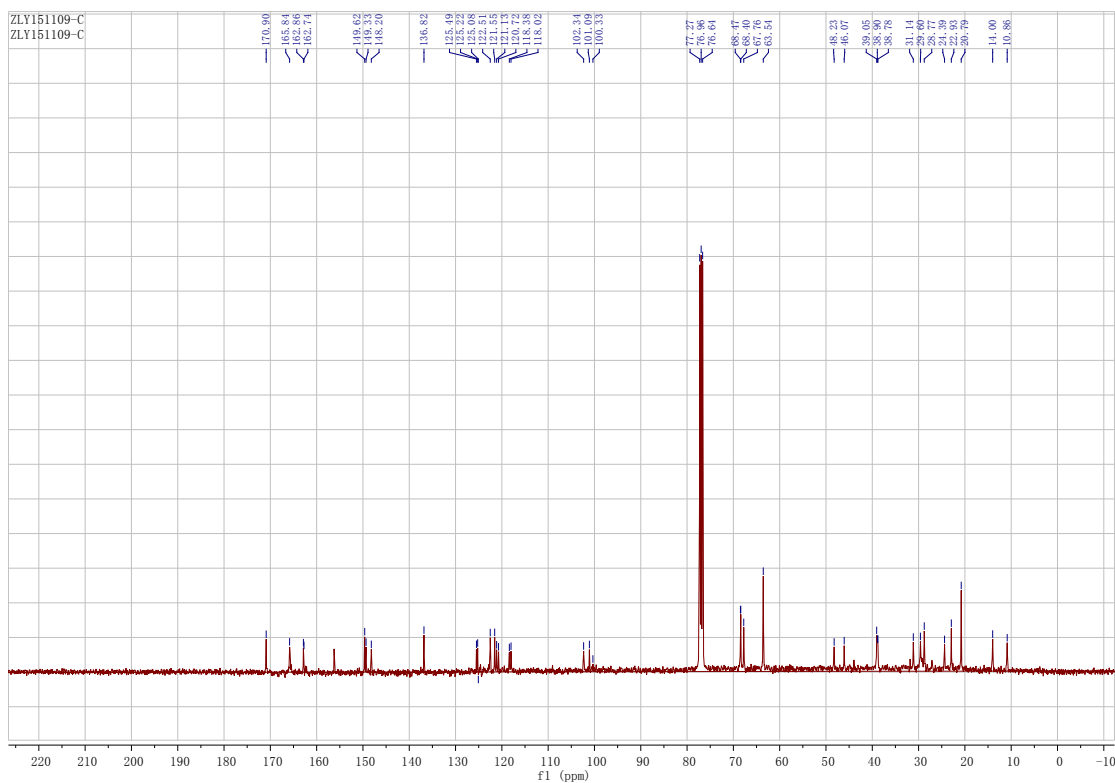

**Fig. S19** The  $^{13}\text{C}$  NMR spectrum of NDI-Py

## Single Mass Analysis

Tolerance = 50.0 PPM / DBE: min = -1.5, max = 100.0

Element prediction: Off

Number of isotope peaks used for i-FIT = 3

Monoisotopic Mass, Even Electron Ions

59 formula(e) evaluated with 4 results within limits (up to 1 closest results for each mass)

Elements Used:

C: 0-43 H: 0-54 N: 0-5 O: 0-10

WD

ECUST institute of Fine Chem

08-Jan-2016

00:29:17

1: TOF MS ES+

1.10e+004

ZLY-1 89 (0.640) Cm (85.91)

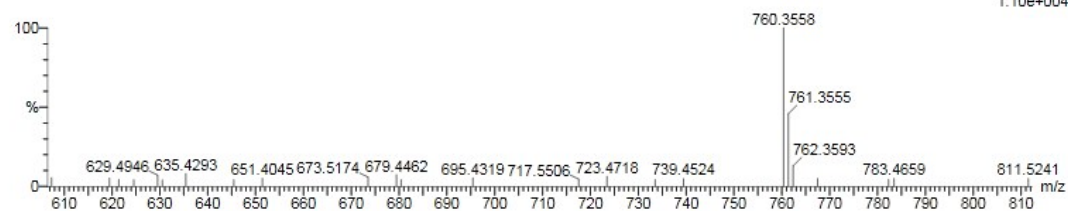

Minimum:

Maximum:

300.0 50.0 -1.5

100.0

| Mass     | Calc. Mass | mDa | PPM | DBE  | i-FIT | i-FIT (Norm) | Formula        |
|----------|------------|-----|-----|------|-------|--------------|----------------|
| 760.3558 | 760.3558   | 0.0 | 0.0 | 18.5 | 12.1  | 0.0          | C40 H50 N5 O10 |

Fig. 20 The HRMS spectrum of NDI-Py
